# Supplementary material
Source: ML conference proceedings conference paper supplement (https://openaccess.thecvf.com/content/ICCV2023/html/Tran_Persistent-Transient_Duality_A_ICCV_2023_paper.html)
Supplement: Supplementary file 2 [file Tran_Persistent-Transient_Duality_A_ICCV_2023_supplemental.zip]

Archive with 1 entries (1 files):
- 06471-supp.pdf
